# Supplementary material for: Cryo-EM structure of the Shigella type III needle complex
Source: PubMed Central journal article supplement (PMC7058355; doi:10.1371/journal.ppat.1008263), 2020-02-24
Supplement: ppat.1008263.s018.pdf [file ppat.1008263.s018.pdf]

| <i>Shigella</i>         | <i>Salmonella</i>       | Domain | % Matched residues | RMSD (Å)    |
|-------------------------|-------------------------|--------|--------------------|-------------|
| MxiG <sub>152-200</sub> | PrgH <sub>171-223</sub> | D2     | 98                 | 1.26        |
| MxiG <sub>201-272</sub> | PrgH <sub>224-294</sub> | D3     | 99                 | 1.49        |
| MxiG <sub>273-340</sub> | PrgH <sub>295-362</sub> | D4     | 100                | 1.33        |
| MxiJ <sub>21-77</sub>   | PrgK <sub>20-76</sub>   | D1     | 100                | 0.82        |
| MxiJ <sub>97-191</sub>  | PrgK <sub>96-196</sub>  | D2     | 95                 | 1.25        |
| MxiD <sub>34-109</sub>  | InvG <sub>34-106</sub>  | N0     | 93                 | 1.62, 1.63* |
| MxiD <sub>110-171</sub> | InvG <sub>108-172</sub> | N1     | 94                 | 2.45, 2.60* |

**S18 Fig. Ca RMSDs calculated from superposed orthologous protein domains in *Shigella* and *Salmonella*.**

The structure of the *Salmonella* domains has been obtained from the models with PDB ID 5TCP (PrgH, PrgK) or 6DV3 (InvG). Fraction of matched residues are relative to the *Shigella* domains.

\* Two RMSD values for the MxiD domains are reported because they have been refined with C8 symmetry.
